# Supplementary material for: Willingness to use PrEP among female university students in Lesotho
Source: PLoS One. 2020 Mar 31;15(3):e0230565. doi: 10.1371/journal.pone.0230565 (PMC7108705; doi:10.1371/journal.pone.0230565)
Supplement: S1 Data — (XLS) [file pone.0230565.s001.xls]

<?xml version="1.0"?>
<?mso-application progid="Excel.Sheet"?>
<Workbook xmlns="urn:schemas-microsoft-com:office:spreadsheet"
 xmlns:o="urn:schemas-microsoft-com:office:office"
 xmlns:x="urn:schemas-microsoft-com:office:excel"
 xmlns:ss="urn:schemas-microsoft-com:office:spreadsheet"
 xmlns:html="http://www.w3.org/TR/REC-html40">
 <DocumentProperties xmlns="urn:schemas-microsoft-com:office:office">
  <Created>2020-03-02T16:17:27Z</Created>
  <LastSaved>2020-03-02T16:17:27Z</LastSaved>
  <Version>16.00</Version>
 </DocumentProperties>
 <OfficeDocumentSettings xmlns="urn:schemas-microsoft-com:office:office">
  <AllowPNG/>
 </OfficeDocumentSettings>
 <ExcelWorkbook xmlns="urn:schemas-microsoft-com:office:excel">
  <WindowHeight>6820</WindowHeight>
  <WindowWidth>19200</WindowWidth>
  <WindowTopX>32767</WindowTopX>
  <WindowTopY>32767</WindowTopY>
  <ProtectStructure>False</ProtectStructure>
  <ProtectWindows>False</ProtectWindows>
 </ExcelWorkbook>
 <Styles>
  <Style ss:ID="Default" ss:Name="Normal">
   <Alignment ss:Vertical="Bottom"/>
   <Borders/>
   <Font ss:FontName="Calibri"/>
   <Interior/>
   <NumberFormat/>
   <Protection/>
  </Style>
  <Style ss:ID="s62">
   <Borders>
    <Border ss:Position="Top" ss:LineStyle="Continuous" ss:Weight="1"/>
   </Borders>
   <Font ss:FontName="Calibri"/>
  </Style>
  <Style ss:ID="s63">
   <Alignment ss:Horizontal="Center" ss:Vertical="Bottom"/>
   <Borders>
    <Border ss:Position="Top" ss:LineStyle="Continuous" ss:Weight="1"/>
   </Borders>
   <Font ss:FontName="Calibri"/>
   <NumberFormat/>
  </Style>
  <Style ss:ID="s64">
   <Borders/>
   <Font ss:FontName="Calibri"/>
  </Style>
  <Style ss:ID="s65">
   <Alignment ss:Horizontal="Center" ss:Vertical="Bottom"/>
   <Font ss:FontName="Calibri"/>
   <NumberFormat/>
  </Style>
  <Style ss:ID="s66">
   <Borders>
    <Border ss:Position="Bottom" ss:LineStyle="Continuous" ss:Weight="1"/>
   </Borders>
   <Font ss:FontName="Calibri"/>
  </Style>
  <Style ss:ID="s67">
   <Alignment ss:Horizontal="Center" ss:Vertical="Bottom"/>
   <Borders>
    <Border ss:Position="Bottom" ss:LineStyle="Continuous" ss:Weight="1"/>
   </Borders>
   <Font ss:FontName="Calibri"/>
   <NumberFormat/>
  </Style>
  <Style ss:ID="s68">
   <Font ss:FontName="Calibri"/>
   <NumberFormat/>
  </Style>
 </Styles>
 <Worksheet ss:Name="Sheet1">
  <Table ss:ExpandedColumnCount="2" ss:ExpandedRowCount="20" x:FullColumns="1"
   x:FullRows="1" ss:DefaultColumnWidth="44" ss:DefaultRowHeight="13">
   <Column ss:AutoFitWidth="0" ss:Width="72"/>
   <Column ss:AutoFitWidth="0" ss:Width="58"/>
   <Row ss:Index="2">
    <Cell ss:StyleID="s62"><Data ss:Type="String"></Data></Cell>
    <Cell ss:StyleID="s63"><Data ss:Type="String">(1)</Data></Cell>
   </Row>
   <Row>
    <Cell ss:StyleID="s64"><Data ss:Type="String">VARIABLES</Data></Cell>
    <Cell ss:StyleID="s65"><Data ss:Type="String">strong_prep</Data></Cell>
   </Row>
   <Row>
    <Cell ss:StyleID="s62"><Data ss:Type="String"></Data></Cell>
    <Cell ss:StyleID="s63"><Data ss:Type="String"></Data></Cell>
   </Row>
   <Row>
    <Cell ss:StyleID="s64"><Data ss:Type="String">y1</Data></Cell>
    <Cell ss:StyleID="s65"><Data ss:Type="String"></Data></Cell>
   </Row>
   <Row>
    <Cell ss:StyleID="s64"><Data ss:Type="String"></Data></Cell>
    <Cell ss:StyleID="s65"><Data ss:Type="String"></Data></Cell>
   </Row>
   <Row>
    <Cell ss:StyleID="s64"><Data ss:Type="String">ind_b</Data></Cell>
    <Cell ss:StyleID="s65"><Data ss:Type="String">0.131**</Data></Cell>
   </Row>
   <Row>
    <Cell ss:StyleID="s64"/>
    <Cell ss:StyleID="s65"><Data ss:Type="String">(0.0118)</Data></Cell>
   </Row>
   <Row>
    <Cell ss:StyleID="s64"><Data ss:Type="String">dir</Data></Cell>
    <Cell ss:StyleID="s65"><Data ss:Type="String">0.253***</Data></Cell>
   </Row>
   <Row>
    <Cell ss:StyleID="s64"/>
    <Cell ss:StyleID="s65"><Data ss:Type="String">(0.00387)</Data></Cell>
   </Row>
   <Row>
    <Cell ss:StyleID="s64"><Data ss:Type="String">tot</Data></Cell>
    <Cell ss:StyleID="s65"><Data ss:Type="String">0.263***</Data></Cell>
   </Row>
   <Row>
    <Cell ss:StyleID="s64"/>
    <Cell ss:StyleID="s65"><Data ss:Type="String">(0.00255)</Data></Cell>
   </Row>
   <Row>
    <Cell ss:StyleID="s64"><Data ss:Type="String">ind</Data></Cell>
    <Cell ss:StyleID="s65"><Data ss:Type="String">0.00984</Data></Cell>
   </Row>
   <Row>
    <Cell ss:StyleID="s64"/>
    <Cell ss:StyleID="s65"><Data ss:Type="String">(0.403)</Data></Cell>
   </Row>
   <Row>
    <Cell ss:StyleID="s64"><Data ss:Type="String">ind_a</Data></Cell>
    <Cell ss:StyleID="s65"><Data ss:Type="String">0.0750</Data></Cell>
   </Row>
   <Row>
    <Cell ss:StyleID="s64"><Data ss:Type="String"></Data></Cell>
    <Cell ss:StyleID="s65"><Data ss:Type="String">(0.328)</Data></Cell>
   </Row>
   <Row>
    <Cell ss:StyleID="s64"><Data ss:Type="String"></Data></Cell>
    <Cell ss:StyleID="s65"><Data ss:Type="String"></Data></Cell>
   </Row>
   <Row>
    <Cell ss:StyleID="s66"><Data ss:Type="String">Observations</Data></Cell>
    <Cell ss:StyleID="s67"><Data ss:Type="String">302</Data></Cell>
   </Row>
   <Row>
    <Cell ss:StyleID="s68"><Data ss:Type="String">pval in parentheses</Data></Cell>
   </Row>
   <Row>
    <Cell ss:StyleID="s68"><Data ss:Type="String">*** p&lt;0.01, ** p&lt;0.05, * p&lt;0.1</Data></Cell>
   </Row>
  </Table>
  <WorksheetOptions xmlns="urn:schemas-microsoft-com:office:excel">
   <Selected/>
   <ProtectObjects>False</ProtectObjects>
   <ProtectScenarios>False</ProtectScenarios>
   <x:ProtectedObjects>False</x:ProtectedObjects>
   <x:ProtectedScenarios>False</x:ProtectedScenarios>
  </WorksheetOptions>
 </Worksheet>
</Workbook>
